# Supplementary material for: Effect of Rivaroxaban Versus Warfarin on Health Care Costs Among Nonvalvular Atrial Fibrillation Patients: Observations from Rivaroxaban Users and Matched Warfarin Users
Source: Springer Nature journal article supplement (doi:10.1007/s12325-015-0189-1), 2015-03-01
Supplement: MOESM1 [file 9203454]

- Atrial fibrillation (AF) is a significant driver of hospitalizations and a considerable burden for the health care system
- Recent studies have compared the new target-specific oral anticoagulants (rivaroxaban, dabigatran, and apixaban) with warfarin and found that these new agents were a cost-effective option
- In the current study, significantly lower hospitalization costs were found for rivaroxaban compared to warfarin users (\$5411 vs. \$7427, respectively;  $P = 0.047$ ) during the observation period
- Despite higher rivaroxaban anticoagulant costs, overall total all-cause and AF-related costs remain comparable due to the cost offset from reduced health care resource utilization

This summary slide represents the opinions of the authors. Sponsorship for this study was funded by Janssen Scientific Affairs, LLC, Raritan, NJ, US. For a full list of acknowledgments and conflicts of interest for all authors of this article, please see the full text online. Copyright © The Authors 2015. Creative Commons Attribution Noncommercial License (CC BY-NC).
